# Supplementary material
Source: bioRxiv or medRxiv preprint supplement (https://www.biorxiv.org/highwire/filestream/38334/field_highwire_adjunct_files/3/130443-4.pdf)
Supplement: Supplementary file [file 130443-4.pdf]

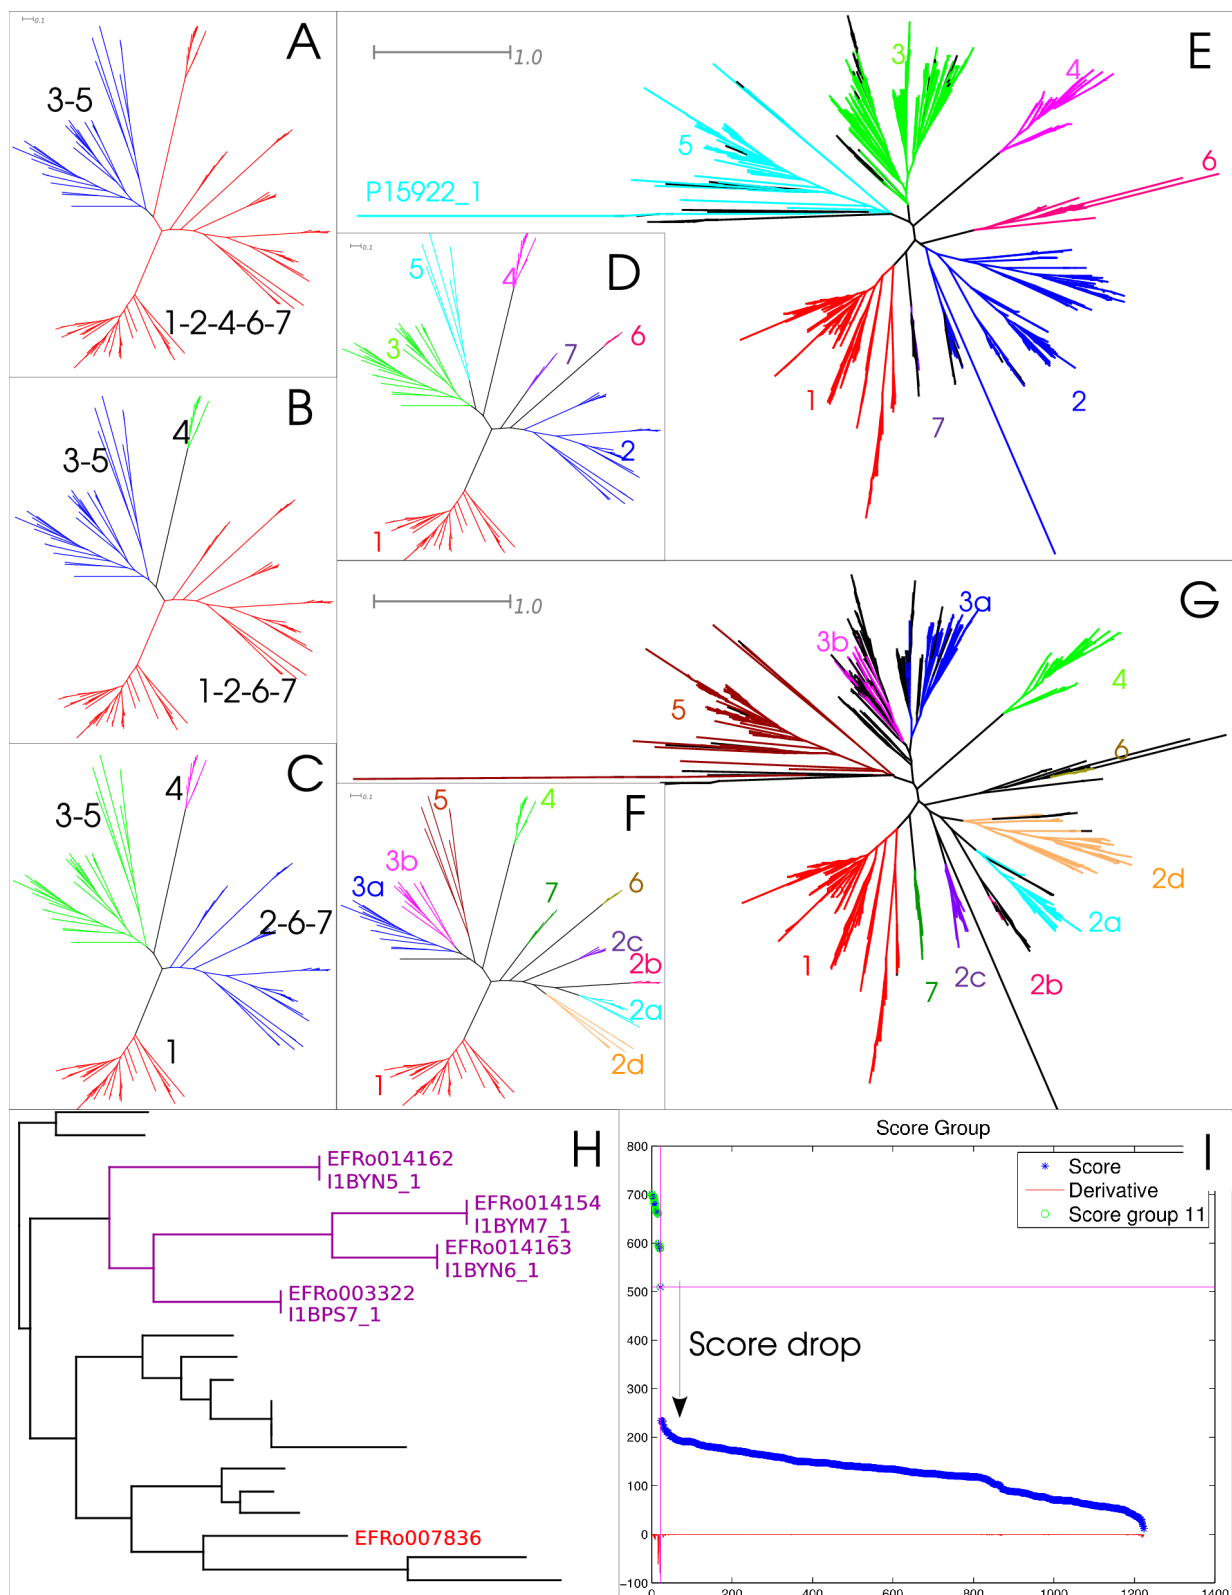

**S Fig 3: HMMERCTTER Analysis of the Polygalacturonase Superfamily**

Numerical analysis in Table 2, details in context. Colors according to HMMERCTTER output, leaves in black could not be clustered. Scale bars indicate 0.1 amino acid substitution per site. (A): C2 clustering; (B): C3 Clustering; (C): C4 Clustering; (D): C7 clustering; (E): Classification based upon C7 with training sequence P15922\_1 indicated; (F): C11 Clustering; (G): Classification based upon C11. The C7 clustering and classification is the reference and its numbering is used to guide comparison. 1: Fungal endoPG; 2a Fungal exoPG (PGXA); 2b Fungal exoPG (PGXB); 2c Endo-XyloGalacturonase; 2d; Exo-RhamnoGalacturonase; 3a: Plant PG; 3b: Plant PG; 4 Fungal Endo-RhamnoGalacturonase; 5: Bacterial PG; 6 Fungal exoPG (PGXC); 7 Zygomycete exoPG. H: Detail of poor classification C7\_C7; I: Score plot of group C11-C7, note the score drop between group and non group members.
